# Supplementary material for: Role of Betaglycan in TGF-β Signaling and Wound Healing in Human Endometriotic Epithelial Cells and in Endometriosis
Source: MDPI journal article supplement (doi:10.3390/biology11040513), 2022-03-26
Supplement: s1 [file s1]

**Table S1** Receiver operating characteristic (ROC) curve

|             |                          |                  |             |                  |                  |
|-------------|--------------------------|------------------|-------------|------------------|------------------|
|             | Area under the ROC curve |                  |             |                  |                  |
|             | Area                     | 0,6604           |             |                  |                  |
|             | Std. Error               | 0,04118          |             |                  |                  |
|             | 95% confidence interval  | 0.5797 to 0.7412 |             |                  |                  |
|             | P value                  | 0,0002014        |             |                  |                  |
|             | Control                  | 82               |             |                  |                  |
|             | Patient                  | 100              |             |                  |                  |
|             |                          |                  |             |                  |                  |
| sBG (pg/mL) | Sensitivity              | 95% CI           | Specificity | 95% CI           | Likelihood ratio |
| < 1024      | 0.59                     | 0.4920 to 0.6813 | 0.6341      | 0.5261 to 0.7302 | 1.613            |
| < 1036      | 0.6                      | 0.5020 to 0.6906 | 0.6341      | 0.5261 to 0.7302 | 1.64             |
| < 1052      | 0.61                     | 0.5120 to 0.6998 | 0.6341      | 0.5261 to 0.7302 | 1.667            |
| < 1113      | 0.62                     | 0.5221 to 0.7090 | 0.6341      | 0.5261 to 0.7302 | 1.695            |
| < 1168      | 0.62                     | 0.5221 to 0.7090 | 0.622       | 0.5138 to 0.7192 | 1.64             |

1. Modulation of BG shedding and functions of BG
  - 1.1. Effects of TGF- $\beta$ 1/- $\beta$ 2 on BG shedding (Fig.1) are mediated via
    - 1.1.1. TGF- $\beta$  receptor type I (ALK5, Fig.2) and transduced via
    - 1.1.2. SMAD3 but not SMAD2 (Fig. 3)
  - 1.2. Effects of recombinant BG on TGF- $\beta$ 1/- $\beta$ 2 (Fig.4)
  - 1.3. Involvement of MMPs in BG shedding (Fig.5) blocked only by TIMP3  
Fig.5D)
  - 1.4. Effects of TGF- $\beta$ 1/- $\beta$ 2 on secretion of MMP2 and MMP3 (Fig. 6)
  - 1.5. Effects of recombinant BG and TGF- $\beta$ 1/- $\beta$ 2 on wound healing (Fig. 7)
2. Evaluation of BG as a biomarker for endometriosis (Fig. 8, Tables 3,4, and S2)

**Figure S1:** Scheme of the experimental setup
